# Supplementary material
Source: ML conference proceedings conference paper supplement (https://aclanthology.org/2020.nuse-1.6)

Stories: 1 / 1

Based on the images, please write an interesting 5-10 sentence story. You can click on the images to enlarge them.

- The story should have a specific beginning, middle and ending.
- Please use correct punctuation.
- Please try to tell a story rather than describing only what you see in the images.

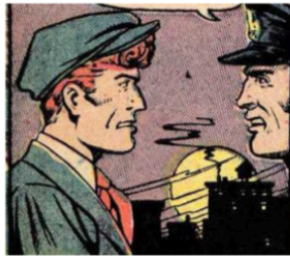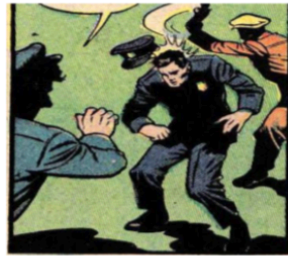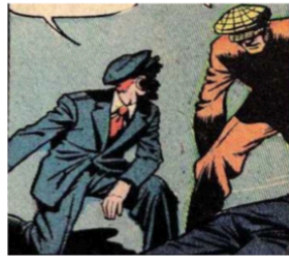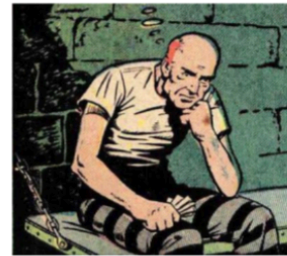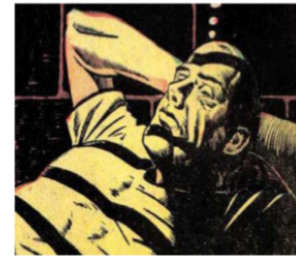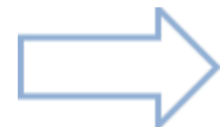

Supplement: Software [file 2020.nuse-1.6.Software.zip]
