# Supplementary material
Source: ML conference proceedings conference paper supplement (https://aclanthology.org/2020.nuse-1.6)
Supplement: Software [file 2020.nuse-1.6.Software.zip]

Stories: 1 / 1

Each image will be presented to you separately. For each, please write 1-2 sentences that continue the story. You can click on the images to enlarge them.

- The story should have a specific beginning, middle and ending.
- Please use correct punctuation.
- Please try to tell a story rather than describing only what you see in the images.

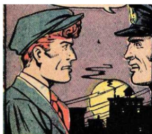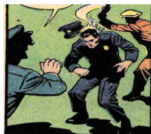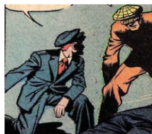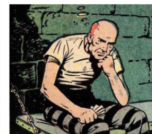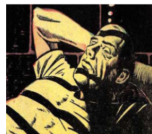

Image #1

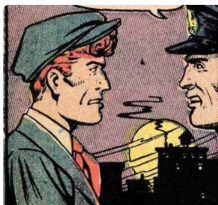

Please write 1-2 sentences to begin your story based on the following image.

Submit
