# Supplementary material
Source: ML conference proceedings conference paper supplement (https://aclanthology.org/2020.nuse-1.6)
Supplement: Software [file 2020.nuse-1.6.Software.zip]

**Author:**

woman, 25-29

High openness, agreeableness

Low extraversion

**Reader:**

man, 35-39

High agreeableness,

Low openness

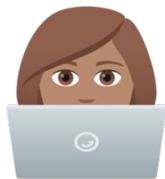

*TBD: Insert story here  
possibly in chunks*

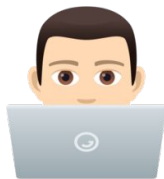

**Overall:** 4/5

**Coherence:** 5/5

**Creative:** 3/5
